# Supplementary material for: The dynamic organization of fungal acetyl-CoA carboxylase
Source: PubMed Central journal article supplement (PMC4833862; doi:10.1038/ncomms11196), 2016-04-13
Supplement: ncomms11196-s1.pdf [file ncomms11196-s1.pdf]

a

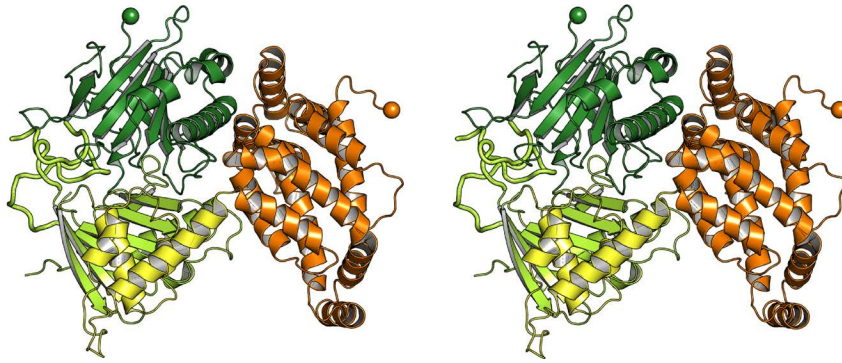

b

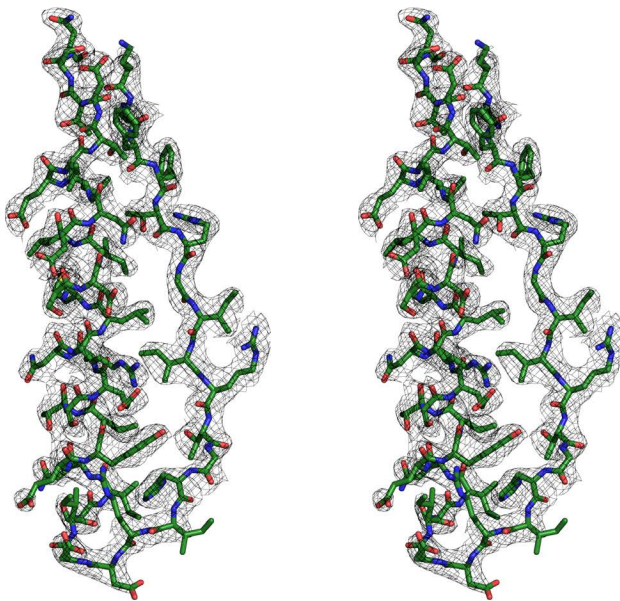

c

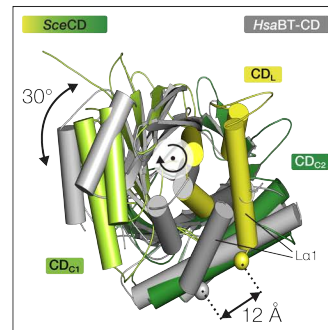

d

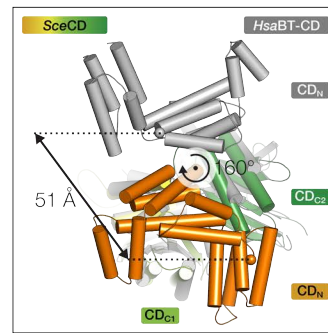

**Supplementary Figure 1: Structure of SceCD and comparison to HsaBT-CD. (a)** Stereo view of SceCD accompanying Fig 1b. **(b)** Stereo view of a representative part of the electron density in CD<sub>C2</sub> of SceCD. Shown is a 2Fo-Fc map contoured at 1  $\sigma$ . **(c)** 30° rotation of CD<sub>C1</sub> between structures of SceCD and HsaBT-CD visualized based on CD<sub>C2</sub> superposition. SceCD is shown in color and HsaBT-CD is shown in gray. Both CD<sub>N</sub> domains and the HsaBT domain were omitted for clarity. The  $\alpha$ -helix L $\alpha$ 1 of both structures, the domain rotation and the distance between N-termini (shown as spheres) is indicated. **(d)** A 160° rotation relates CD<sub>N</sub> in SceCD to HsaBT-CD based on a superposition of CD<sub>L</sub>/CD<sub>C1</sub>. HsaBT domain was removed for clarity. Spheres indicate the N-termini and the coloring is as in (c).

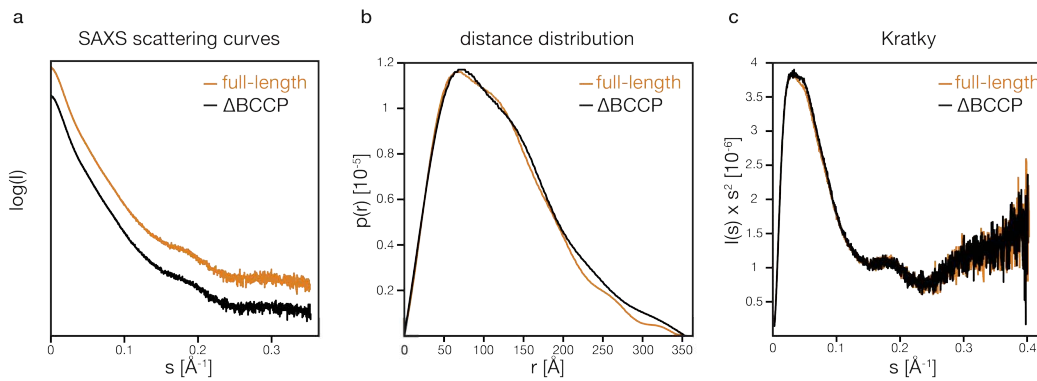

**Supplementary Figure 2: SAXS analysis of fungal ACC.** Scattering curves (a), distance distribution (b) and Kratky plots (c) of full-length *CthACC* (orange) and *CthΔBCCP* (black) demonstrating that BCCP-deletion has no impact on the overall solution structure. For clarity, scattering curves are shown with a y-axis offset.

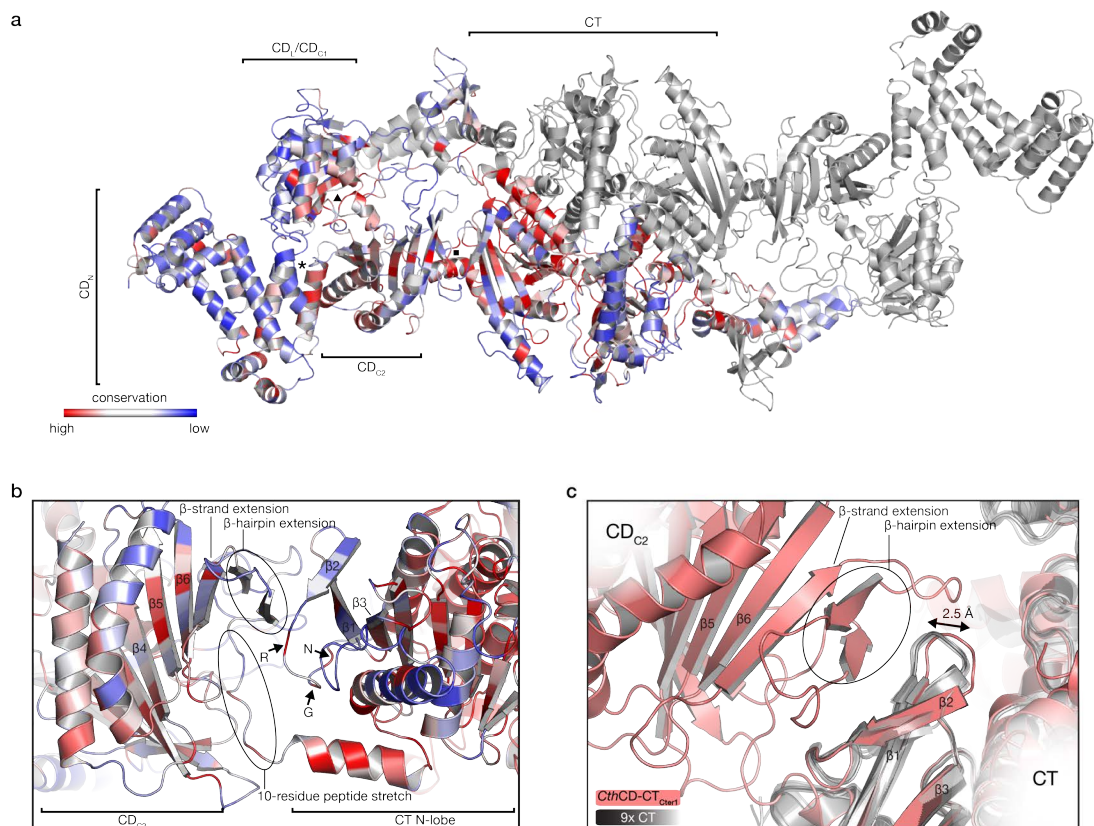

**Supplementary Figure 3: Conservation analysis of *CthACC*.** (a) Cartoon representation of *CthCD-CT* with one protomer colored according to conservation in a gradient from high (red) to low (blue). The second protomer is colored in gray. Contact regions of  $CD_N$  and  $CD_L/CD_{C1}$  (asterisk),  $CD_{C1}$  and  $CD_{C2}$  (triangle) and  $CD_{C2}$  and CT (square) are surrounded by regions of higher conservation. (b) Close-up on the edge-like hinge between  $CD_{C2}$  and CT. Highly conserved residues of the RxxGxN motif are indicated as well as important strands of  $CD_{C2}$  and CT. The second CT protomer is omitted for clarity. (c) Superposition of nine isolated CT crystal structures (gray) onto the CT domain of *CthCD-CT*<sub>Cter1</sub> (red). The loop preceding the conserved RxxGxN motif is displaced in the CD-CT contact by 2.5 Å compared to isolated crystal structures. PDB accession codes of structures used for superposition: 1od2, 1uys, 1uyt, 1w2x, 3h0j, 3h0q, 3k8x, 3pgq, 3tv5.

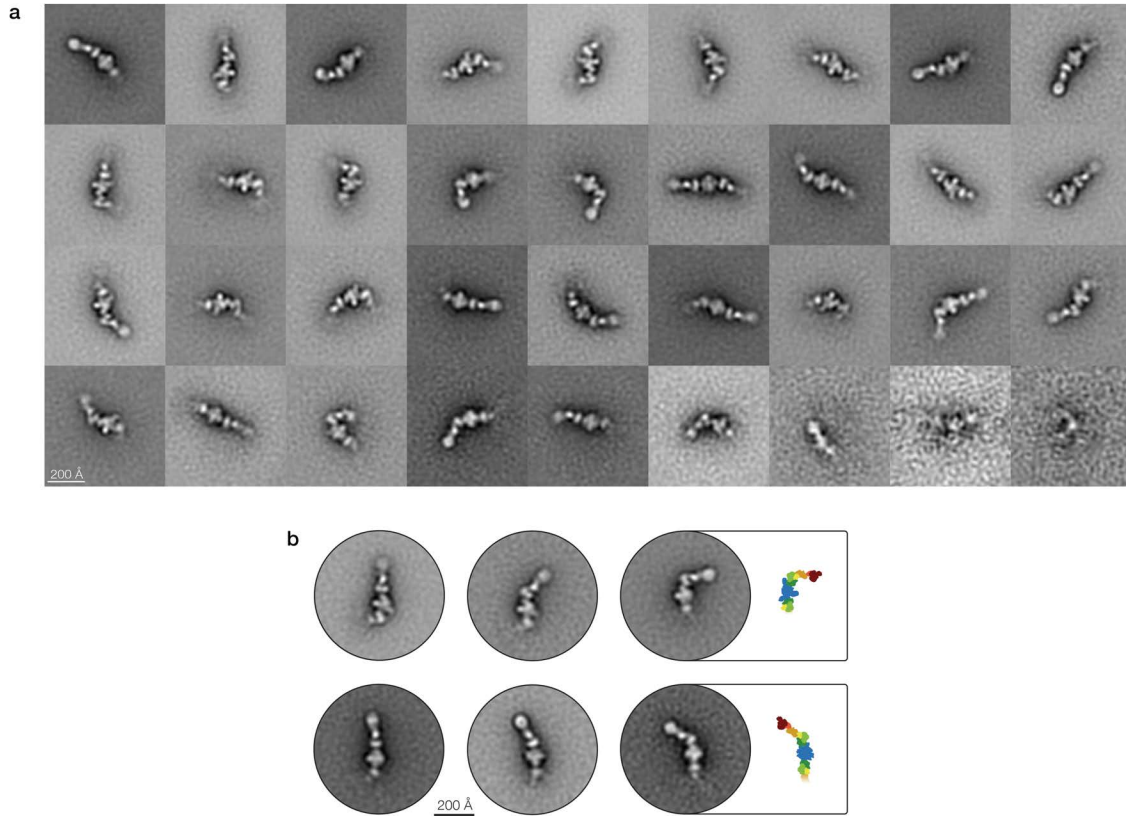

**Supplementary Figure 4: Negative stain electron microscopy class averages of *CthACC* illustrating its flexibility.** (a) 18031 particles were 2D-classified into 36 classes using the MLF2D method. Classes are sorted by number of particles per class, with the highest number at the top left and the lowest number at the bottom right. Scale bar 200 Å. (b) 2D-class averages from negative stain EM analysis depict the ensemble of solution conformations of the intrinsic flexibility of *CthACC*. Scale bar 200 Å.

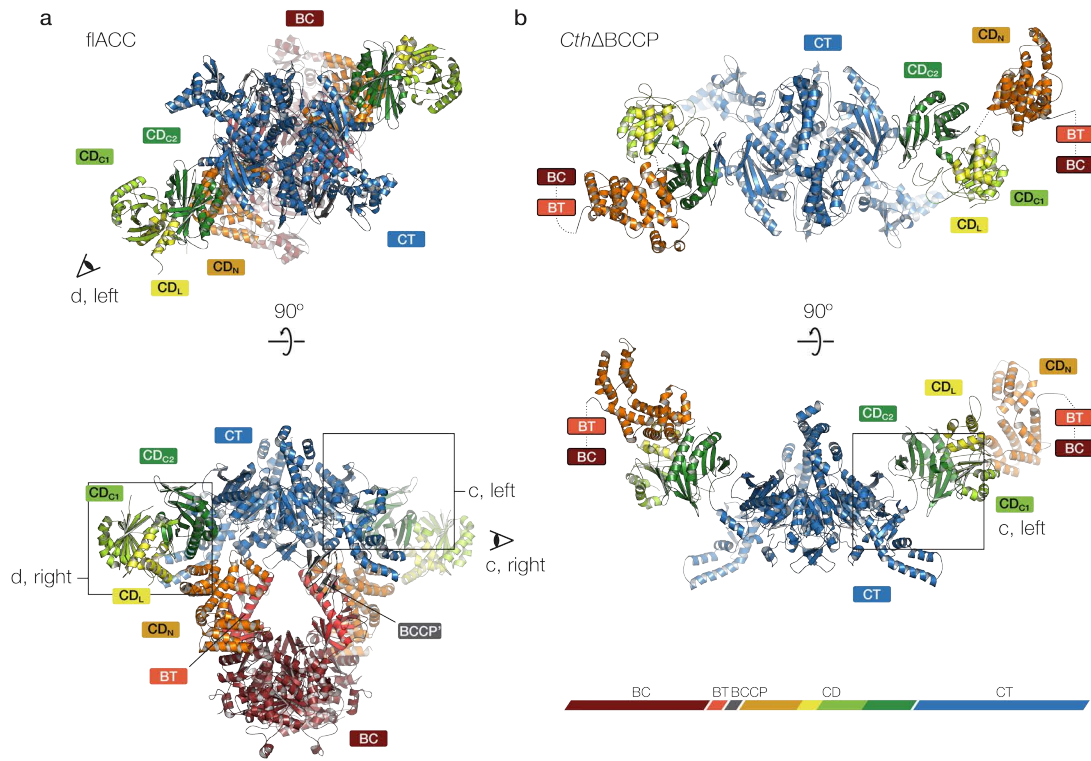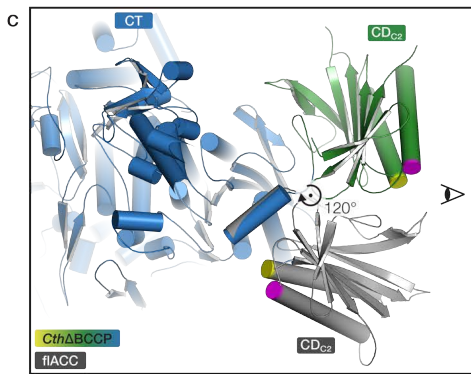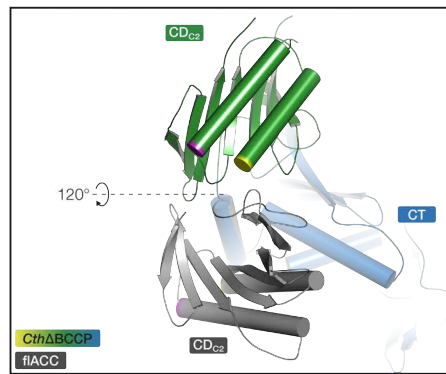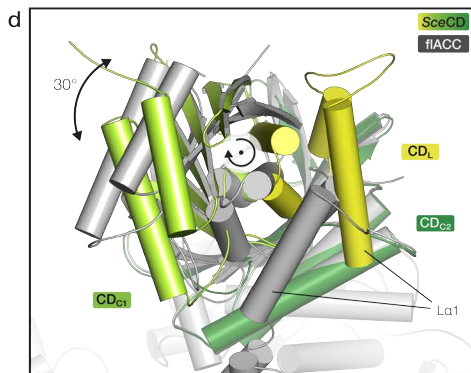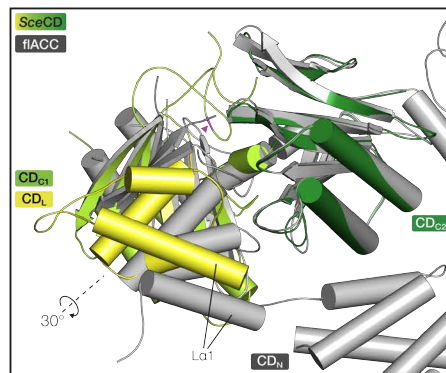

**Supplementary Figure 5: Conformational variability in fungal ACC. (a)** Cartoon representation of triangular flACC (PDB accession code: 5csl). In (a) and (b) domains are colored according to the linear sequence scheme in (b). **(b)** Cartoon representation of *Cth* $\Delta$ BCCP. The orientations of (a) and (b) are based on a superposition of the CT domains. Fields of view for panels (c) and (d) are indicated with boxes and eyes. **(c)** Left: Detailed view of the CD<sub>C2</sub>/CT 120° hinge motion viewed along the rotation axis. *Cth* $\Delta$ BCCP is colored and flACC is shown in gray for clarity. Corresponding ends of CD<sub>C2</sub>-helices are colored in yellow and magenta. The rotation axis is indicated and the view for the right subpanel is indicated with an eye. Right: View onto the rotation axis. **(d)** Conformational states of the CD<sub>C1</sub>-CD<sub>C2</sub> hinge in the non-phosphorylated flACC and in the phosphorylated *Sce*CD crystal structures when superimposed on CD<sub>C2</sub> domains. L $\alpha$ 1, the first N-terminal helix of the CD<sub>L</sub> domain, is labeled to illustrate the conformational differences. The left panel shows the view along the rotation axis, the right panel corresponds to a view onto the axis. The position of the phosphorylated Ser1157 in the regulatory loop is indicated by a magenta triangle.

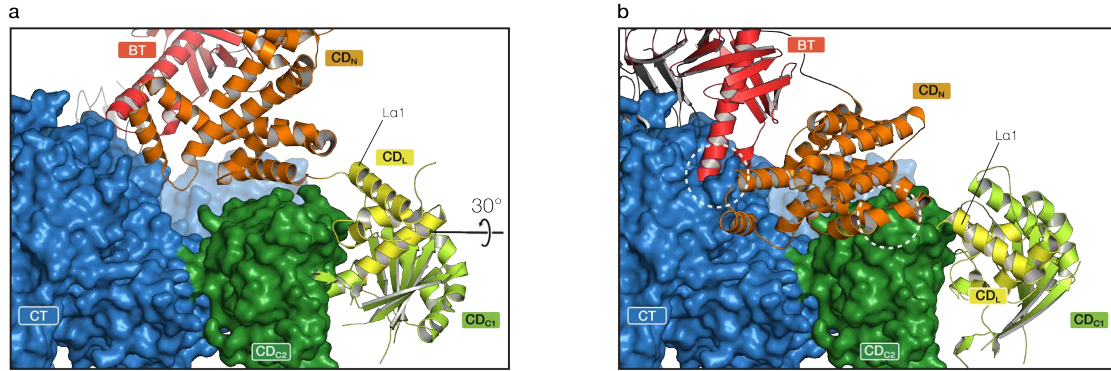

**Supplementary Figure 6: Conformation of phosphorylated CD<sub>C1</sub>-CD<sub>C2</sub> hinge is incompatible with BT/CD<sub>N</sub> conformation in flACC. (a)** Detailed view on flACC (PDB accession code: 5csl) with CT and CD<sub>C2</sub> domains shown as surface and BT, BCCP, CD<sub>N</sub>, CD<sub>L</sub> and CD<sub>C1</sub> domains shown as cartoon **(b)** flACC model with the CD<sub>C1</sub>-CD<sub>C2</sub> hinge conformation as observed in the SceCD crystal structure. Clashes of BT/CD<sub>N</sub> with CT and CD<sub>N</sub> with CD<sub>C2</sub>, that are caused by the 30° rotation of CD<sub>C1</sub> relative to CD<sub>C2</sub> (rotation axis shown in (a)), are indicated with white circles. For orientation, the first helix of CD<sub>L</sub> is labeled in both panels.

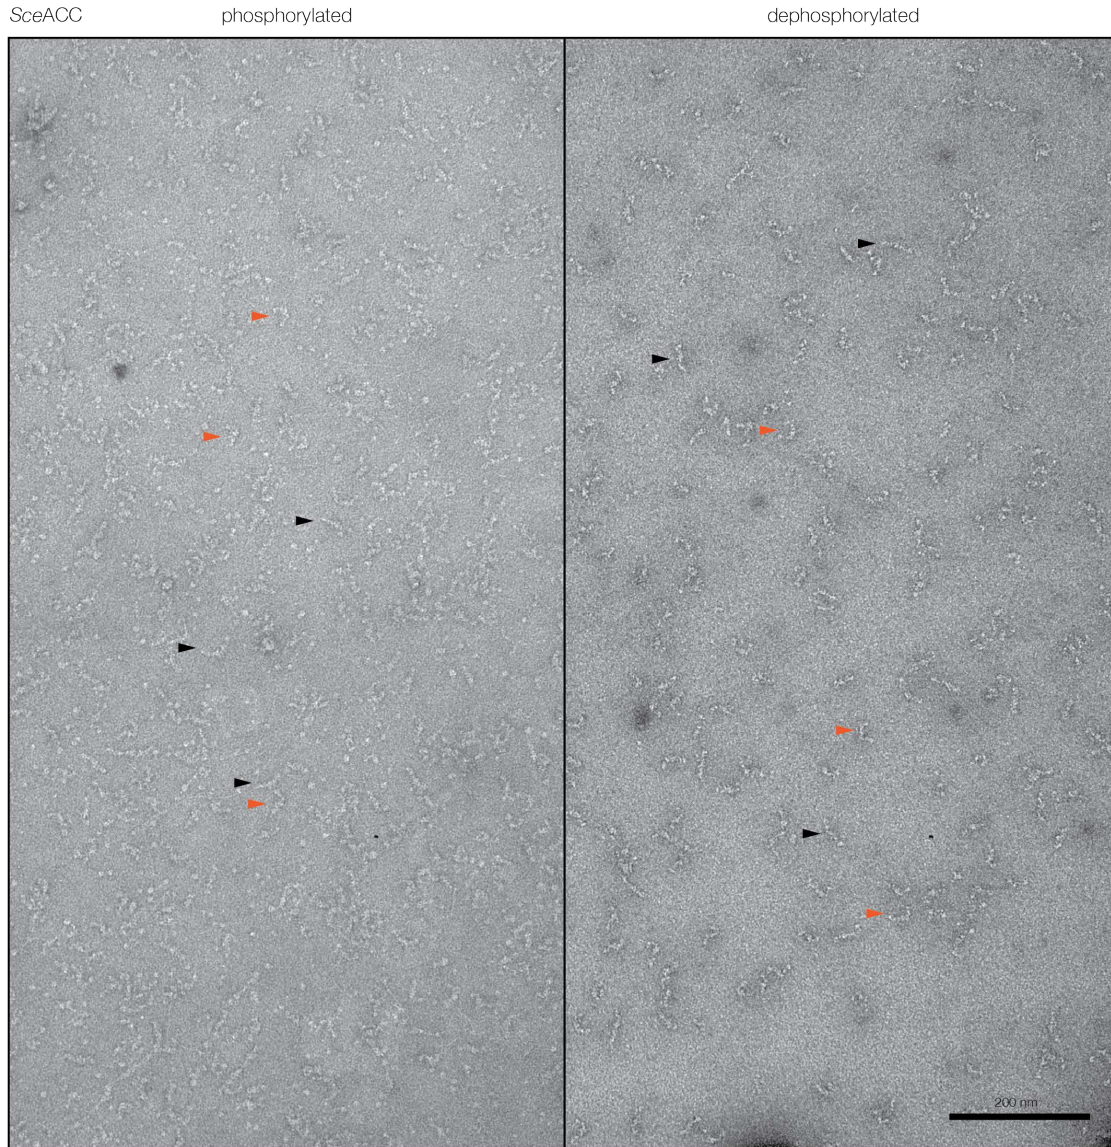

**Supplementary Figure 7: Negative stain electron microscopy of phosphorylated and dephosphorylated SceACC shows similar degree of conformational flexibility.** Micrographs of phosphorylated (left) and dephosphorylated SceACC (right) are shown side by side. Selected particles representing elongated and U-shaped molecules are indicated with black and orange arrows, respectively. The scale bar is 200 nm.



Supplementary Table 1: Small angle x-ray scattering data collection and processing

|                                         | full-length <i>Cth</i> ACC     | <i>Cth</i> $\Delta$ BCCP       |
|-----------------------------------------|--------------------------------|--------------------------------|
| Instrument                              | B21 at<br>Diamond Light Source | B21 at<br>Diamond Light Source |
| Beam size (mm)                          | 1 x 5                          | 1 x 5                          |
| Wavelength (Å)                          | 1                              | 1                              |
| q range (Å <sup>-1</sup> )              | 0.005 - 0.4                    | 0.005 - 0.4                    |
| Detector distance (m)                   | 3.92                           | 3.92                           |
| Temperature (K)                         | 293                            | 293                            |
| Protein concentration (mg/ml)           | 2.5, 5, 10                     | 2.5, 5, 10                     |
| Scan repeats                            | 30                             | 30                             |
| Total exposure time (s)                 | 300                            | 300                            |
| Capillary diameter (mm)                 | 1.6                            | 1.6                            |
| I(0) (Å <sup>-1</sup> ) [from P(r)]     | 0.023                          | 0.024                          |
| Rg (Å) [from P(r)]                      | 94                             | 97                             |
| Rg (Å) (from Guinier)                   | 89 ± 2                         | 92 ± 3                         |
| Porod volume estimate (Å <sup>3</sup> ) | 1176290                        | 1174390                        |
| Dmax (Å)                                | 350                            | 350                            |
